# Supplementary material for: COVID-19 in congenital heart disease (COaCHeD) study
Source: PubMed Central journal article supplement — Open Heart. 2023 Jul 17;10(2):e002356. doi: 10.1136/openhrt-2023-002356 (PMC10357297; doi:10.1136/openhrt-2023-002356), 2023-07-17
Supplement: openhrt-2023-002356supp001.pdf [file openhrt-2023-002356supp001.pdf]

1 [Supplementary Data](#)

2

3 [Supplementary Table 1](#)

| <b>Congenital heart disease category</b>                                                      | <b>Children in hospital<br/>[n=44] n(%)</b> | <b>Adults in hospital<br/>[n=74] n(%)</b> |
|-----------------------------------------------------------------------------------------------|---------------------------------------------|-------------------------------------------|
| Hypoplastic left heart syndrome                                                               | 3 (6.8)                                     | 0 (0.0)                                   |
| Functionally univentricular heart                                                             | 3 (6.8)                                     | 5 (6.8)                                   |
| Common arterial trunk                                                                         | 1 (2.3)                                     | 0 (0.0)                                   |
| Transposition of the great arteries and VSD/ Double outlet right ventricle transposition type | 5 (11.4)                                    | 2 (2.7)                                   |
| Interrupted aortic arch                                                                       | 0 (0.0)                                     | 0 (0.0)                                   |
| Transposition of the great arteries                                                           | 1 (2.3)                                     | 1 (1.4)                                   |
| Pulmonary atresia with intact ventricular septum                                              | 0 (0.0)                                     | 2 (2.7)                                   |
| Pulmonary atresia with VSD                                                                    | 1 (2.3)                                     | 7 (9.5)                                   |
| Miscellaneous congenital heart disease                                                        | 0 (0.0)                                     | 3 (4.1)                                   |
| Atrioventricular septal defect                                                                | 6 (13.6)                                    | 10 (13.5)                                 |
| Tetralogy of Fallot/ Double outlet right ventricle tetralogy type                             | 3 (6.8)                                     | 10 (13.5)                                 |
| Aortic stenosis                                                                               | 3 (6.8)                                     | 5 (6.8)                                   |
| Tricuspid valve abnormality/ Ebstein abnormality                                              | 1 (2.3)                                     | 1 (1.4)                                   |
| Mitral valve abnormality                                                                      | 2 (4.5)                                     | 5 (6.8)                                   |
| Total anomalous pulmonary venous connection                                                   | 1 (2.3)                                     | 0 (0.0)                                   |
| Aortic arch obstruction                                                                       | 2 (4.5)                                     | 3 (4.1)                                   |
| Pulmonary stenosis                                                                            | 2 (4.5)                                     | 1 (1.4)                                   |
| Subaortic stenosis                                                                            | 0 (0.0)                                     | 0 (0.0)                                   |
| VSD +/- atrial septal defect +/- patent ductus arteriosus                                     | 0 (0.0)                                     | 0 (0.0)                                   |
| Atrial septal defect                                                                          | 6 (13.6)                                    | 11 (14.9)                                 |
| Patent ductus arteriosus                                                                      | 2 (4.5)                                     | 8 (10.8)                                  |
| Arrhythmia                                                                                    | 0 (0.0)                                     | 0 (0.0)                                   |
| Miscellaneous terms                                                                           | 0 (0.0)                                     | 0 (0.0)                                   |
| Cardiomyopathy (including post-transplant)                                                    | 1 (2.3)                                     | 0 (0.0)                                   |
| Aortic regurgitation                                                                          | 1 (2.3)                                     | 0 (0.0)                                   |

4

5 Supplementary Table 1:

6 Primary cardiac diagnosis of participants in the study who were admitted to hospital

7

8 Note: A single primary cardiac diagnosis was assigned to each case using a hierarchical  
9 system<sup>19</sup>; VSD: ventricular septal defect

10

11 *\*Miscellaneous congenital heart disease includes: congenitally corrected transposition of the*  
12 *great arteries +/- other morphological changes. #Miscellaneous terms include: post cardiac*  
13 *transplant and aortic root dilatation/ dissection.*

14

15

16 Supplementary Table 2

| <b>Genetic diagnoses and syndromes</b> |
|----------------------------------------|
| 22q11 microdeletion syndrome           |
| Bardet Biedl syndrome type 2           |
| Beaulieu-Boycott-Innes syndrome        |
| CHARGE syndrome                        |
| Ehlers Danlos syndrome                 |
| Hurler Syndrome                        |
| Marfan syndrome                        |
| Nemaline Myopathy - ACTA gene exon     |
| Noonan syndrome                        |
| Oculofaciocardiodental syndrome        |
| POLR2A mutation                        |
| Trisomy 21                             |
| Tuberous Sclerosis                     |
| Turner syndrome                        |
| VACTERL syndrome                       |
| William syndrome                       |

17

18

Supplementary Table 2: List of genetic diagnoses and syndromes that participants in the study were known to live with.

19

20

21

22

23

24

25

26

27

28

29

30

31

32

33

34

35

36

37

38

39

40

41

42 Supplementary Table 3

43

| <b>Comorbidities</b>                                     |
|----------------------------------------------------------|
| Acquired brain injury                                    |
| Anorectal malformation                                   |
| Asthma                                                   |
| Bilateral hearing loss                                   |
| Bulbar palsy                                             |
| Chronic kidney disease                                   |
| Chronic lung disease                                     |
| Colonic stricture                                        |
| COPD                                                     |
| Developmental delay                                      |
| Diabetes                                                 |
| Endocarditis                                             |
| Epilepsy                                                 |
| Extra dural haematoma                                    |
| Gastroesophageal reflux disease                          |
| Haematological disease                                   |
| Hydronephrosis                                           |
| Hypercholesterolaemia                                    |
| Hypothyroidism                                           |
| Immune deficiency (Myelodysplastic Syndrome, Asplenia)   |
| Left hemidiaphragm palsy                                 |
| Medullary nephrocalcinosis                               |
| Mental health disease                                    |
| Migraine                                                 |
| Necrotising enterocolitis (previous)                     |
| Neurodisability                                          |
| Osteoporosis                                             |
| Prematurity                                              |
| Previous malignancy                                      |
| Recurrent lower respiratory tract infection / aspiration |
| Renal dysplasia                                          |
| Scoliosis                                                |
| Single kidney                                            |
| Unsafe swallow – Nasogastric / Gastrostomy feeding       |
| Vitamin / Iron deficiencies                              |

44

45 Supplementary Table 3: List of associated co-morbidities that participants in the study lived  
46 with.

47

48

49 Supplementary Table 4

50

| Outcome                                                              | Odds Ratio  | P-value         | 95% Confidence Interval |
|----------------------------------------------------------------------|-------------|-----------------|-------------------------|
| Ethnicity ( <i>Reference: White</i> )                                |             |                 |                         |
| - Asian                                                              | 0.94        | 0.93            | 0.22-4.03               |
| - Black                                                              | 5.01        | 0.15            | 0.57-44.09              |
| - Mixed/Other                                                        | 0.48        | 0.29            | 0.12-1.85               |
| Univentricular circulation                                           | 0.17        | 0.08            | 0.02-1.23               |
| Age (years)                                                          | <b>0.88</b> | <b>&lt;0.05</b> | <b>0.77-1.00</b>        |
| Female sex                                                           | 2.58        | 0.07            | 0.91-7.29               |
| Deprivation quintile<br>( <i>Reference: 1=most deprived</i> )        |             |                 |                         |
| - 2                                                                  | 0.89        | 0.88            | 0.19-4.08               |
| - 3                                                                  | 2.87        | 0.22            | 0.53-15.58              |
| - 4                                                                  | 0.97        | 0.97            | 0.15-6.26               |
| - 5                                                                  | 1.12        | 0.91            | 0.14-8.96               |
| Number of comorbidities                                              | 1.52        | 0.46            | 0.51-4.54               |
| Genetic disease                                                      | 0.52        | 0.31            | 0.15-1.83               |
| Oxygen saturations <90%                                              | 5.45        | 0.06            | 0.93-31.97              |
| Z-score weight                                                       | 0.92        | 0.49            | 0.72-1.17               |
| Second wave of COVID-19<br>( <i>Reference: first COVID-19 wave</i> ) | <b>0.04</b> | <b>&lt;0.01</b> | <b>0.01-0.23</b>        |

51

52

Supplementary table 4: Predictors of hospitalisation in children (n=127) – sensitivity analysis  
adjusted for COVID-19 wave

53

54

55

56

57

58

59

60

61

62

63

64

65

66

67

68

69

70

71

72

73

74

75

76 Supplementary Table 5

77

| Outcome                                                              | Odds Ratio  | P-value         | 95% Confidence Interval |
|----------------------------------------------------------------------|-------------|-----------------|-------------------------|
| Ethnicity ( <i>Reference: White</i> )                                |             |                 |                         |
| - Asian                                                              | 2.08        | 0.44            | 0.33-13.16              |
| - Black                                                              | 1.42        | 0.84            | 0.05-39.56              |
| - Mixed/Other                                                        | 0.72        | 0.57            | 0.23-2.21               |
| Univentricular circulation                                           | 0.79        | 0.79            | 0.14-4.33               |
| Age (years)                                                          | <b>1.05</b> | <b>&lt;0.01</b> | <b>1.01-1.09</b>        |
| Female sex                                                           | 0.50        | 0.21            | 0.17-1.49               |
| Deprivation quintile<br>( <i>Reference: 1=most deprived</i> )        |             |                 |                         |
| - 2                                                                  | 0.27        | 0.16            | 0.04-1.66               |
| - 3                                                                  | 0.25        | 0.12            | 0.04-1.41               |
| - 4                                                                  | 0.37        | 0.26            | 0.07-2.06               |
| - 5                                                                  | 1.71        | 0.43            | 0.45-6.60               |
| Number of comorbidities                                              | 0.34        | 0.14            | 0.08-1.46               |
| Genetic disease                                                      | 4.64        | 0.07            | 0.86-24.94              |
| Pulmonary arterial hypertension                                      | <b>6.34</b> | <b>0.02</b>     | <b>1.39-28.84</b>       |
| Oxygen saturations <90%                                              | 2.05        | 0.36            | 0.43-9.81               |
| BMI $\geq 30$                                                        | 2.16        | 0.34            | 0.43-10.76              |
| Second wave of COVID-19<br>( <i>Reference: first COVID-19 wave</i> ) | 0.47        | 0.24            | 0.14-1.66               |

78

79 Supplementary Table 5: Predictors of mortality in adults (n=278) – sensitivity analysis  
80 adjusted for COVID-19 wave.

81 Supplementary Table 6

82

| Outcome                                                              | Odds Ratio  | P-value     | 95% Confidence Interval |
|----------------------------------------------------------------------|-------------|-------------|-------------------------|
| Ethnicity ( <i>Reference: White</i> )                                |             |             |                         |
| - Asian                                                              | 1.45        | 0.55        | 0.43-4.95               |
| - Black                                                              | 0.46        | 0.48        | 0.05-3.93               |
| - Mixed/Other                                                        | 0.45        | 0.04        | 0.21-0.96               |
| Univentricular circulation                                           | <b>0.26</b> | <b>0.02</b> | <b>0.09-0.78</b>        |
| Age (years)                                                          | 1.02        | 0.06        | 1.00-1.05               |
| Female sex                                                           | 0.96        | 0.91        | 0.48-1.91               |
| Deprivation quintile<br>( <i>Reference: 1=most deprived</i> )        |             |             |                         |
| - 2                                                                  | 0.77        | 0.60        | 0.29-2.07               |
| - 3                                                                  | 0.49        | 0.19        | 0.17-1.42               |
| - 4                                                                  | 0.43        | 0.13        | 0.15-1.28               |
| - 5                                                                  | 0.37        | 0.08        | 0.12-1.14               |
| Number of comorbidities                                              | <b>3.52</b> | <b>0.01</b> | <b>1.30-9.50</b>        |
| Genetic disease                                                      | 2.93        | 0.05        | 0.99-8.65               |
| Pulmonary arterial hypertension                                      | 1.01        | 0.98        | 0.36-2.80               |
| Oxygen saturations <90%                                              | 2.85        | 0.05        | 0.97-8.40               |
| BMI ≥30                                                              | 1.60        | 0.37        | 0.57-4.49               |
| Second wave of COVID-19<br>( <i>Reference: first COVID-19 wave</i> ) | <b>0.36</b> | <b>0.03</b> | <b>0.15-0.90</b>        |

83

84 Supplementary Table 6: Predictors of hospitalisation in adults (n=278) – sensitivity analysis

85 adjusted for COVID-19 wave

86
